# Supplementary material for: Revisiting tuberculous pleurisy: pleural fluid characteristics and diagnostic yield of mycobacterial culture in an endemic area
Source: HighWire-hosted journal article supplement (doi:10.1136/thoraxjnl-2011-201363), 2012-03-21

**Supplementary Table 1** Diagnostic yields of effusion culture, sputum culture, and pleural biopsy in 334 cases of tuberculous pleurisy after eliminating 48 presumptive cases enrolled by criteria number 4 mentioned in the methods.

| <b>Diagnostic procedures</b>                       | <b>Number (%)</b> |
|----------------------------------------------------|-------------------|
| Positive effusion culture                          | 244/334 (73)      |
| Positive sputum culture                            | 184/334 (55)      |
| Positive sputum culture/ sputum culture performed  | 184/299 (62)      |
| Combining effusion and sputum cultures             | 301/334 (90)      |
| Observation of granuloma/ pleural biopsy performed | 110/127 (87)      |

**Supplementary Table 2** Biochemical characteristics and cells differential of 334 tuberculous pleurisy after eliminating 48 presumptive cases.

| Characteristic               | N   | Mean ± SD   | Median (IQR)      | Effusion culture                   |                                    | P Value |
|------------------------------|-----|-------------|-------------------|------------------------------------|------------------------------------|---------|
|                              |     |             |                   | Positive<br>Mean±SD or Median(IQR) | Negative<br>Mean±SD or Median(IQR) |         |
| <b>Blood test</b>            |     |             |                   |                                    |                                    |         |
| WBC (/μL)                    | 307 | 7646 ± 3279 | 7050 (5700, 8670) | 7755 ± 3536                        | 7361 ± 2481                        | 0.27    |
| Platelet (K/μL)              | 303 | 278 ± 117   | 269 (199, 344)    | 262 ± 115                          | 320 ± 113                          | < 0.001 |
| Protein (g/dL)               | 151 | 6.7 ± 1.0   | 6.8 (6, 7.5)      | 6.6 ± 1.0                          | 7.0 ± 1.1                          | 0.09    |
| LDH (U/L)                    | 134 | 582 ± 280   | 503 (420, 651)    | 509 (416, 660)                     | 494 (421, 625)                     | 0.54    |
| <b>Pleural effusion test</b> |     |             |                   |                                    |                                    |         |
| WBC (/μL)                    | 321 | 2227 ± 2047 | 1600 (800, 3010)  | 1600 (800, 3060)                   | 1820 (900, 2782)                   | 0.82    |
| Lymphocyte %                 | 319 | 74 ± 26     | 83 (60, 94)       | 78 (55, 91)                        | 93 (82, 98)                        | < 0.001 |
| Neutrophil %                 | 319 | 16 ± 22     | 6 (1, 22)         | 9 (2, 28)                          | 2 (0, 8)                           | < 0.001 |
| Protein (g/dL)               | 315 | 4.7 ± 1.0   | 4.9 (4.2, 5.4)    | 4.6 ± 1.1                          | 5.0 ± 0.8                          | < 0.001 |
| LDH (U/L)                    | 315 | 1035 ± 1332 | 709 (458, 1098)   | 849 (500, 1313)                    | 560 (394, 763)                     | < 0.001 |
| Glucose (mg/dL)              | 287 | 105 ± 55    | 96 (76, 124)      | 101 ± 56                           | 115 ± 53                           | 0.06    |
| <b>Effusion-serum ratio</b>  |     |             |                   |                                    |                                    |         |
| Protein (effusion/serum)     | 150 | 0.7 ± 0.1   | 0.7 (0.6, 0.8)    | 0.7 ± 0.1                          | 0.7 ± 0.2                          | 0.66    |
| LDH (effusion/serum)         | 129 | 2.0 ± 1.7   | 1.3 (0.9, 2.4)    | 2.1 ± 1.8                          | 1.3 ± 1.2                          | 0.01    |

IQR, interquartile range; LDH, lactate dehydrogenase; SD, standard deviation; WBC, white blood cell

**Supplementary Figure 1** A hypothesis of a continuous spectrum of tuberculous pleurisy based on the findings of this study.

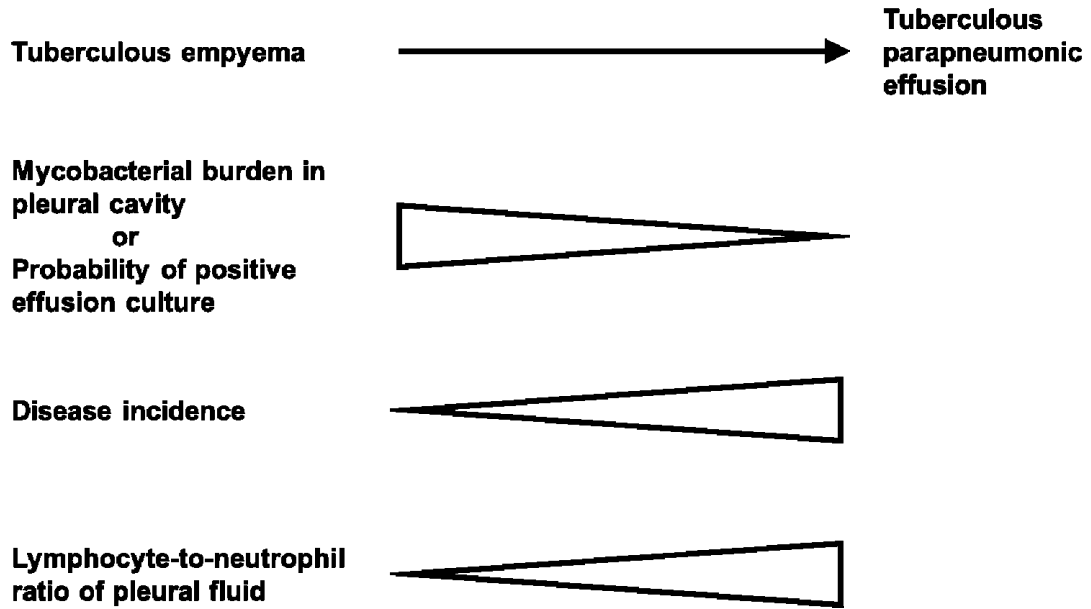

Supplement: thoraxjnl-2011-201363-s1.pdf [file thoraxjnl-2011-201363-s1.pdf]
